# Supplementary figures and images for: In Silico Establishment and Validation of Novel Lipid Metabolism‐Related Gene Signature in Bladder Cancer
Source: Hindawi journal article supplement (doi:10.1155/2022/3170950), 2022-01-01

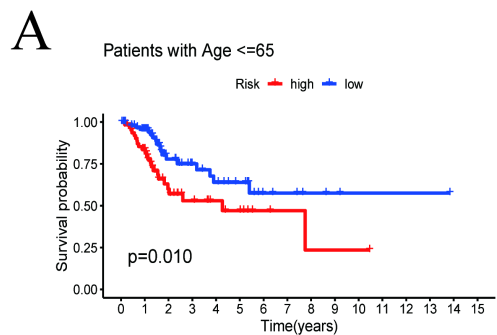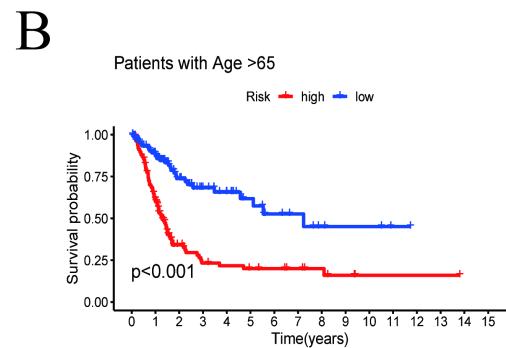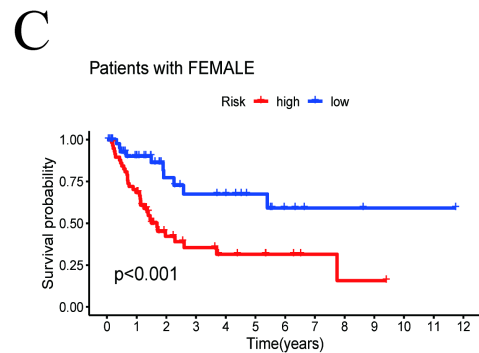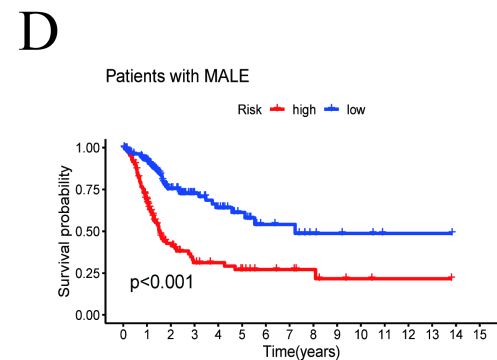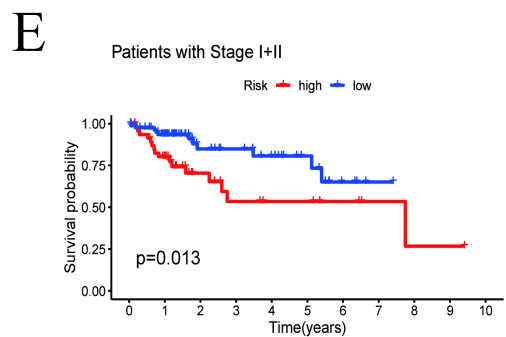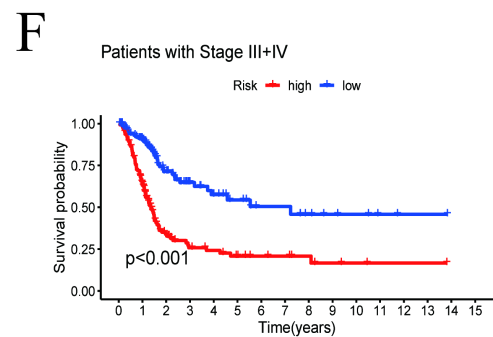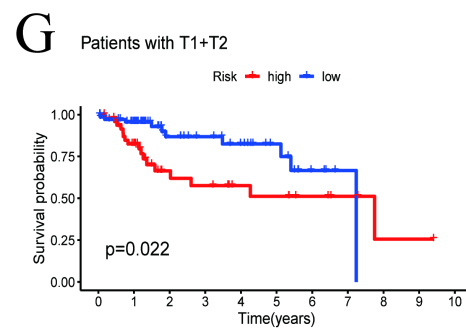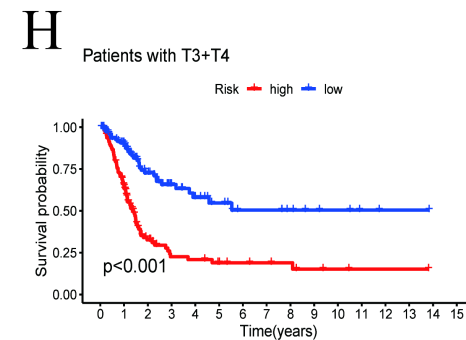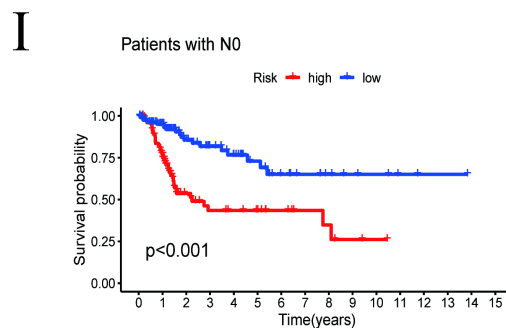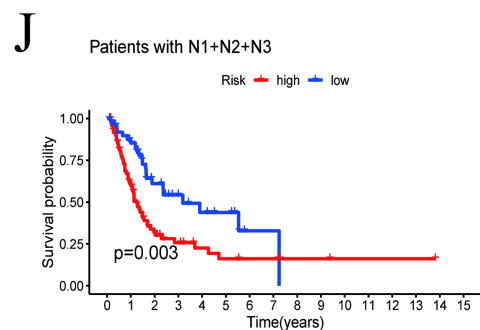

Supplement: f1 [file 3170950.f1.zip]

Global Schoenfeld Test p: 0.7726

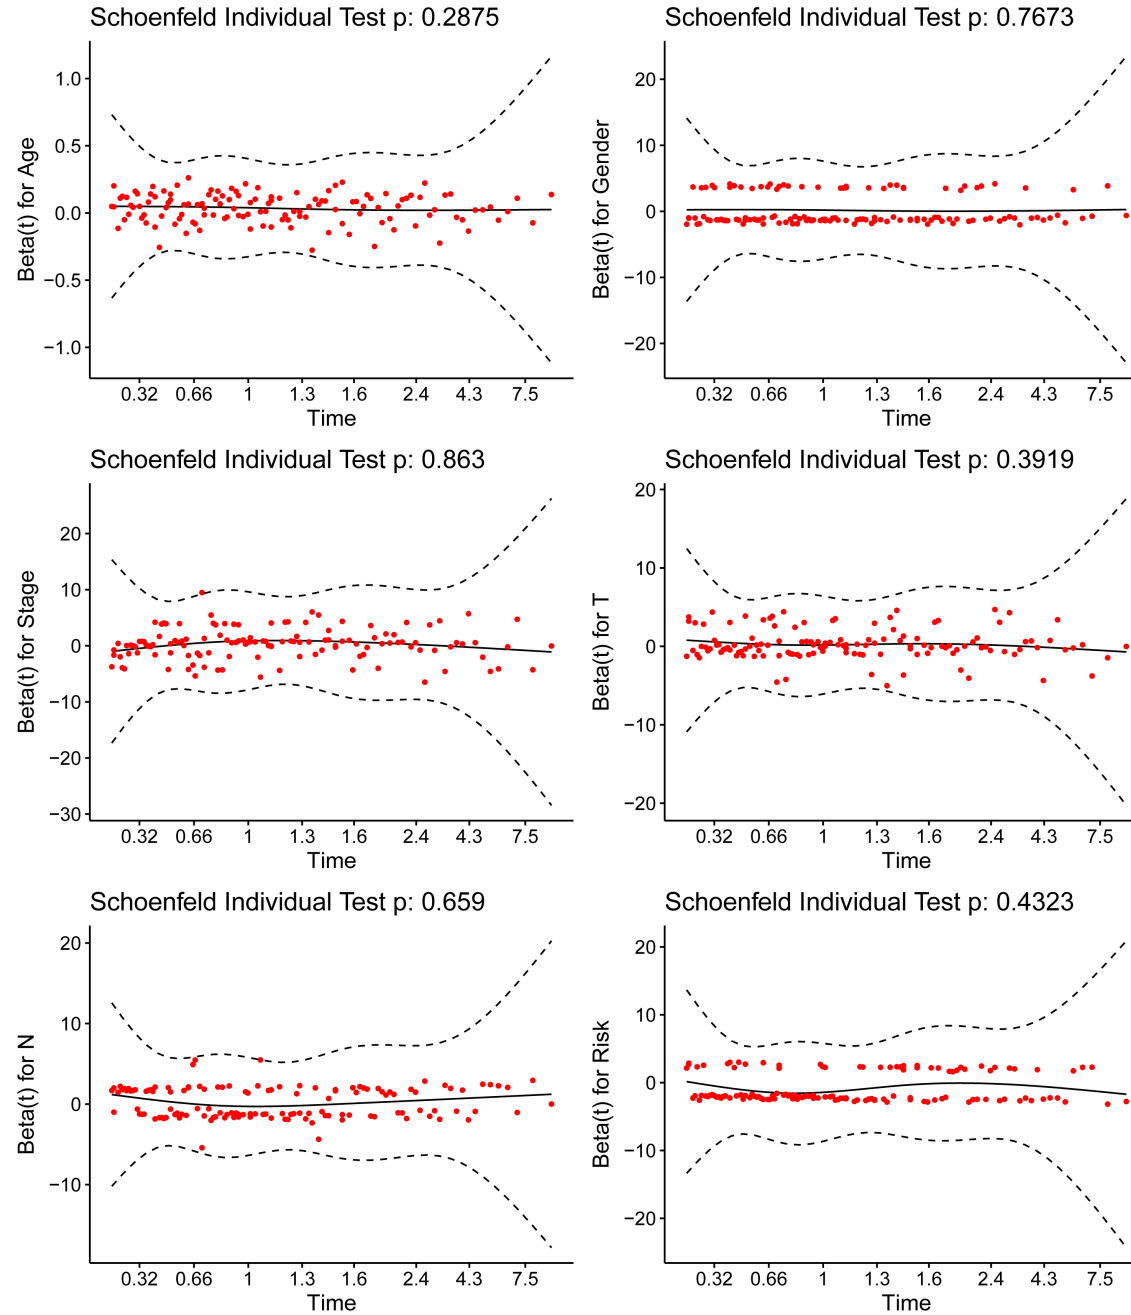

Supplement: f1 [file 3170950.f1.zip]

A

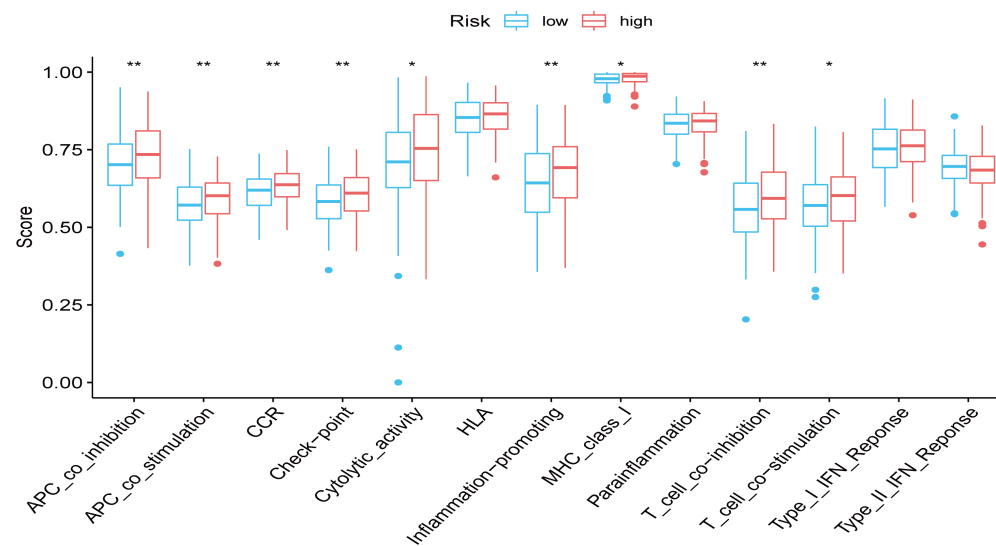

B

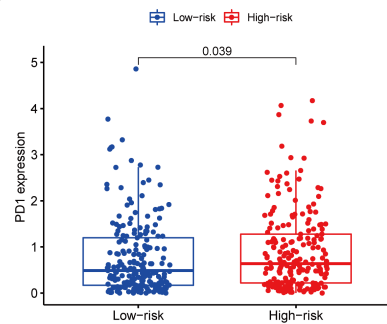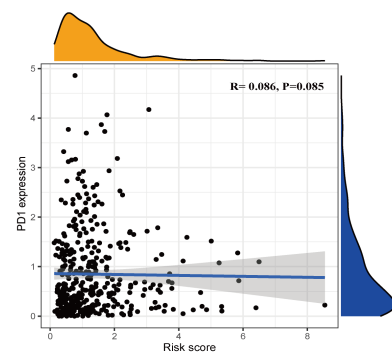

C

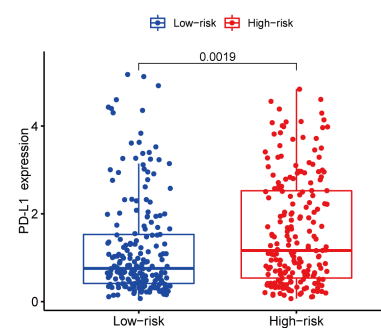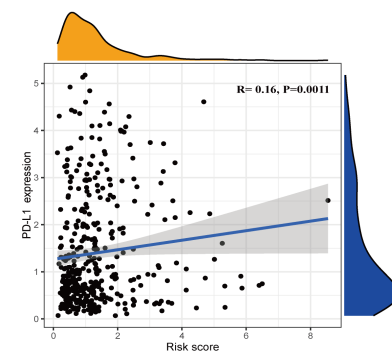

D

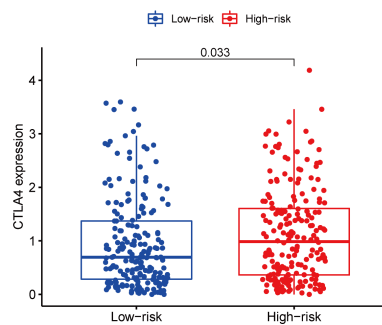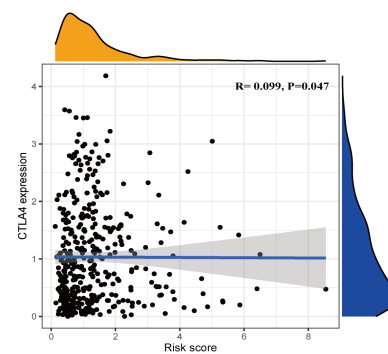

E

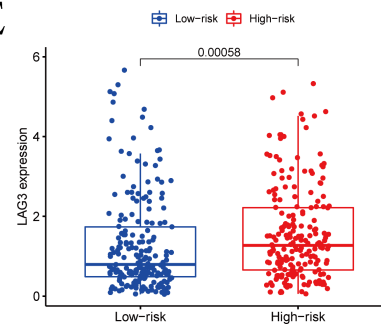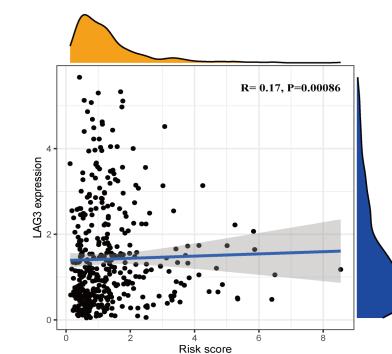

Supplement: f1 [file 3170950.f1.zip]

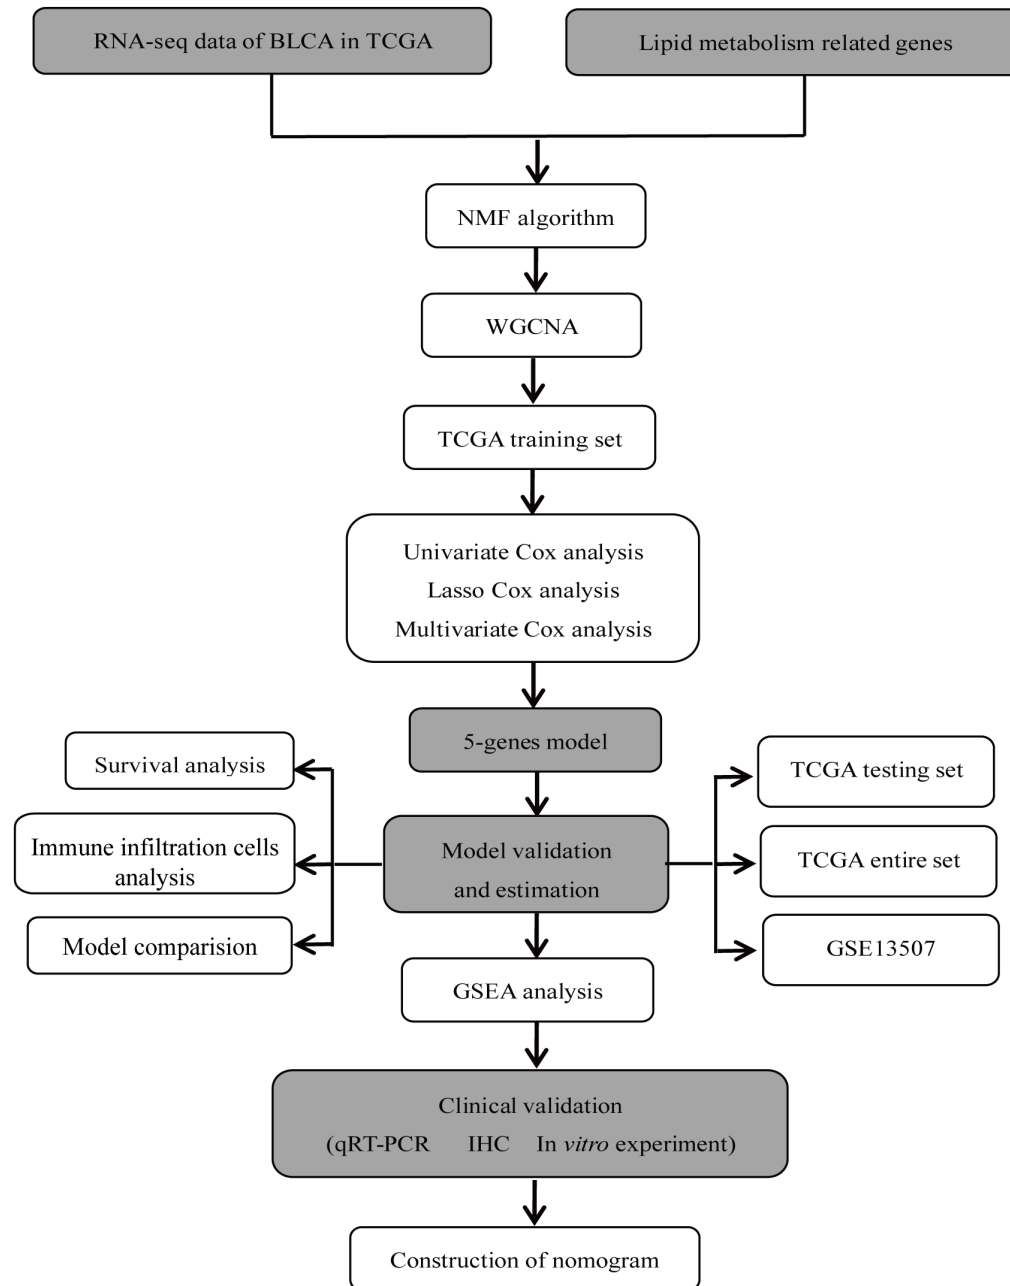

Supplement: f1 [file 3170950.f1.zip]

A

T24

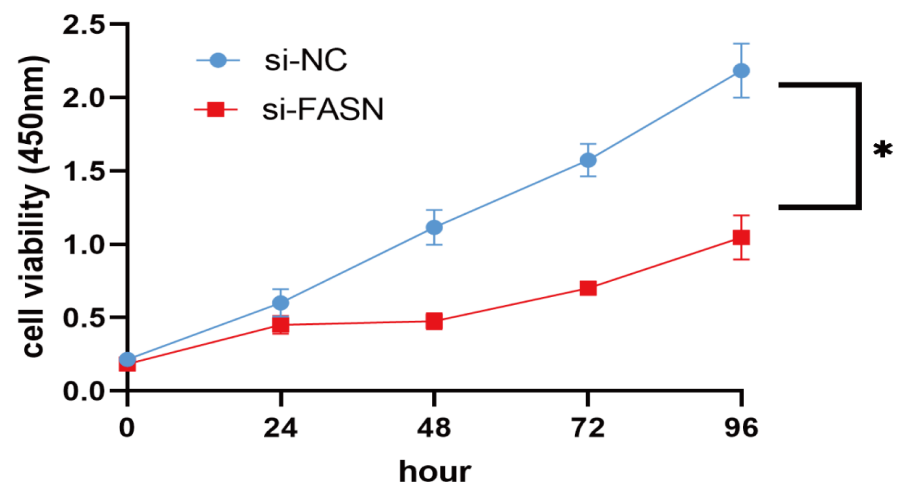

B

UMUC3

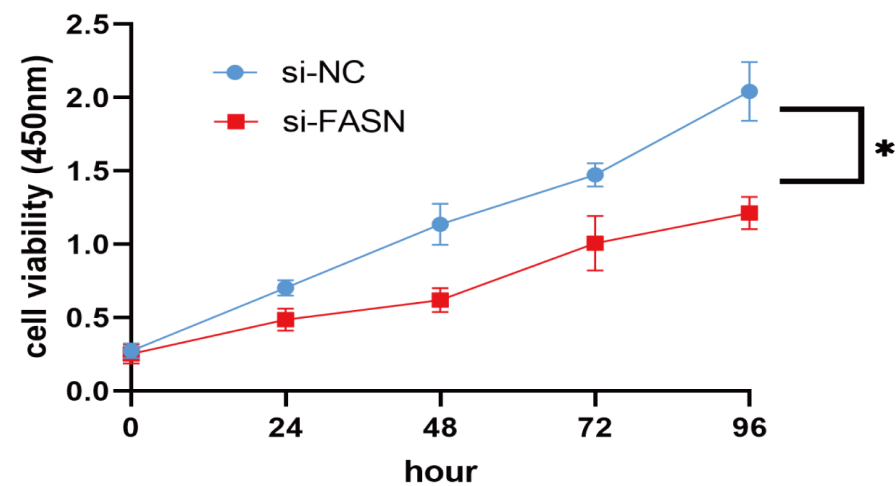

C

T24

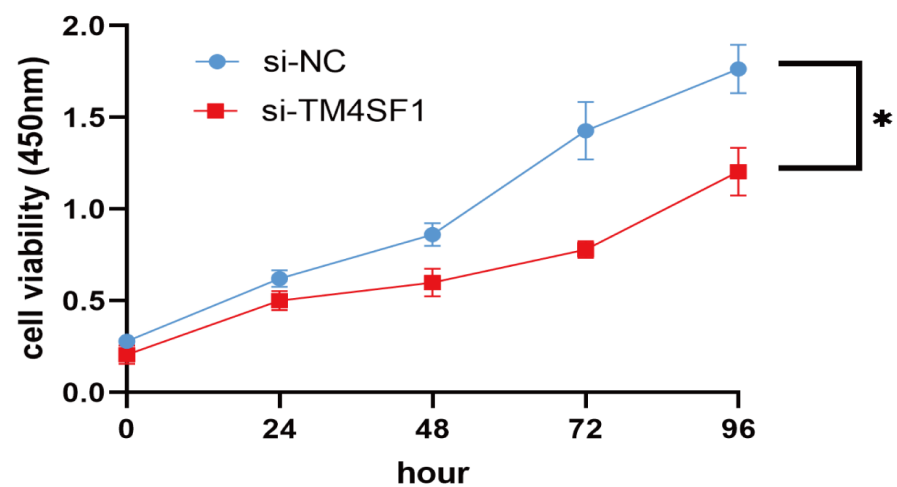

D

UMUC3

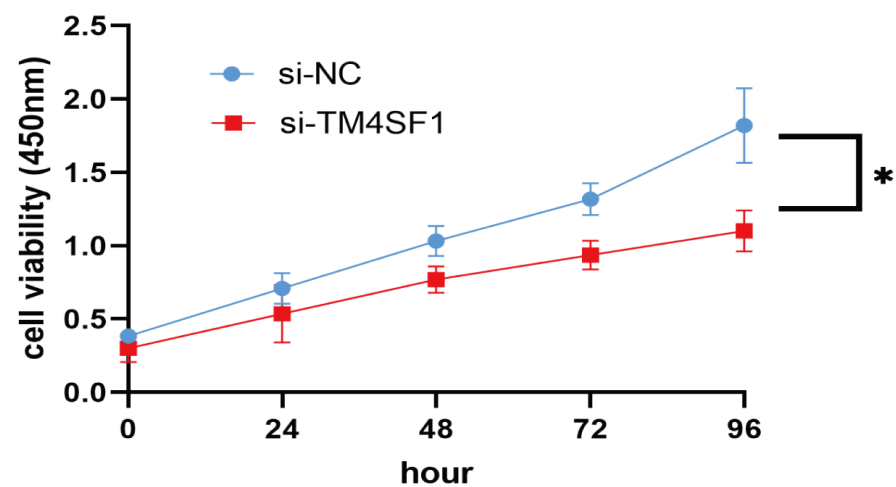

Supplement: f1 [file 3170950.f1.zip]

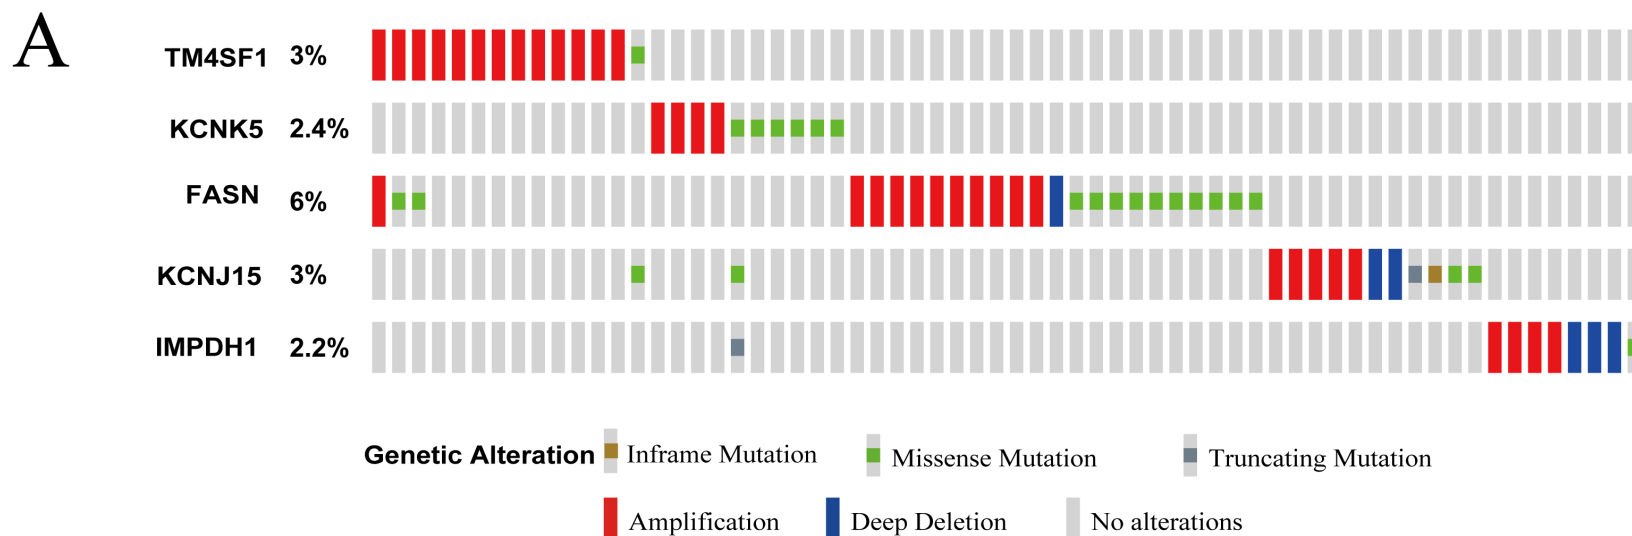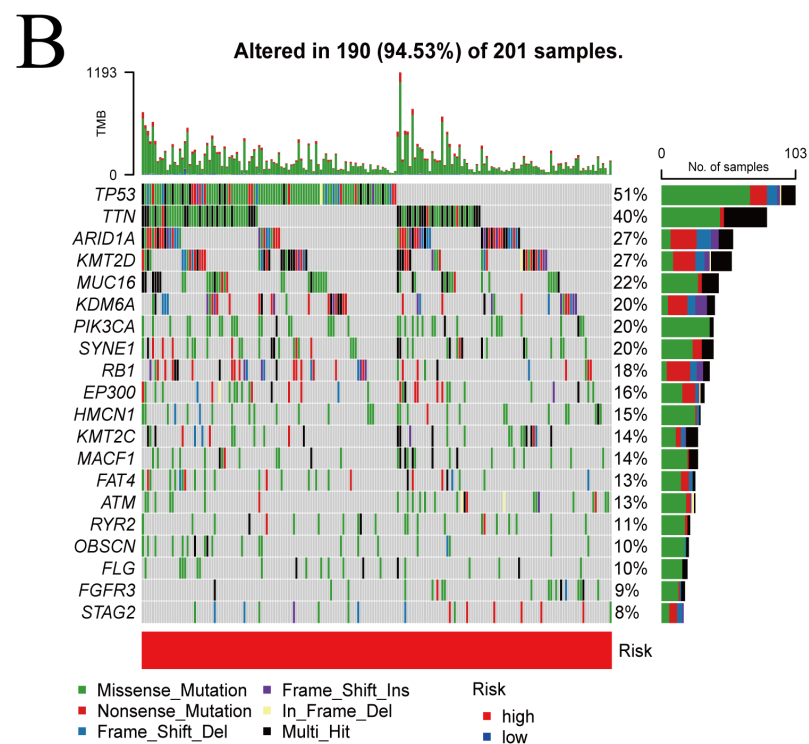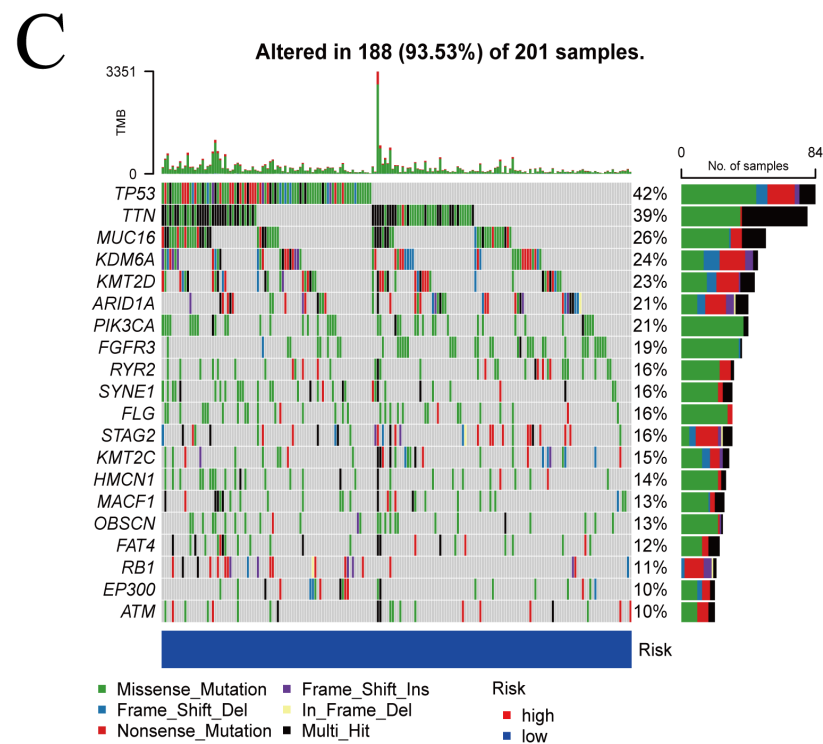

Supplement: f1 [file 3170950.f1.zip]

A

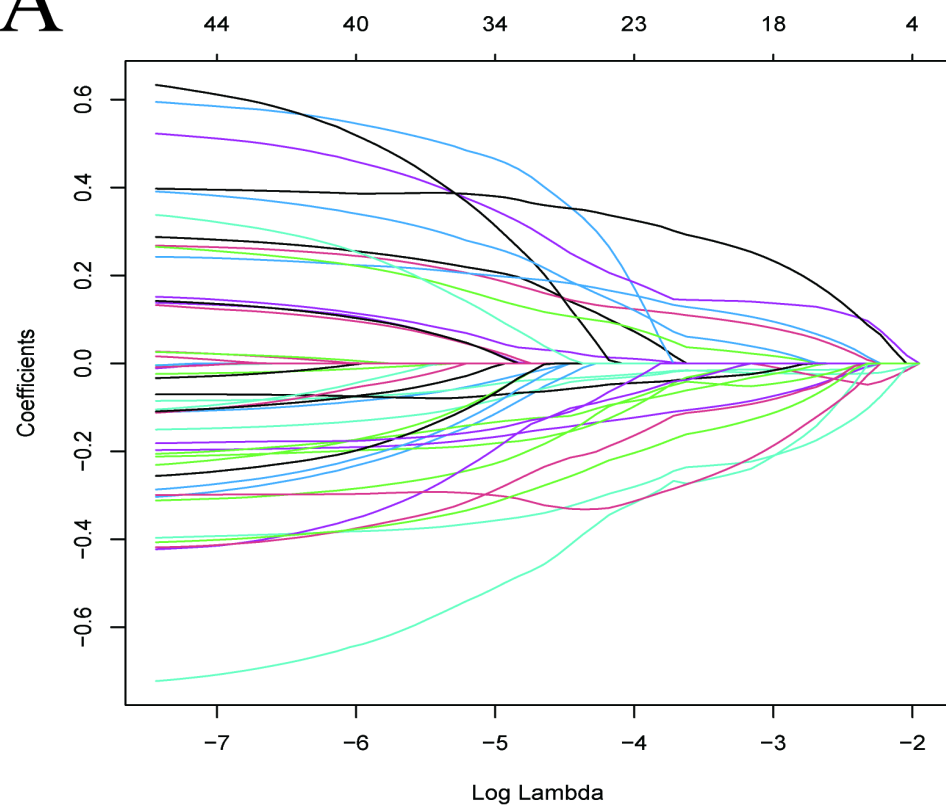

B

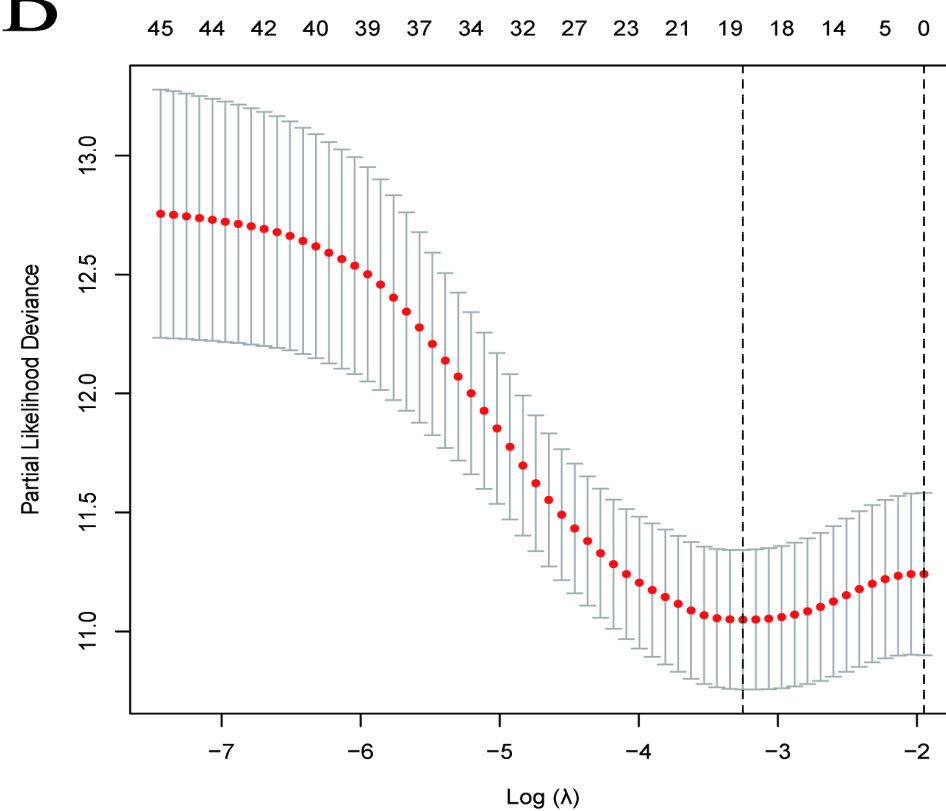

Supplement: f1 [file 3170950.f1.zip]

A

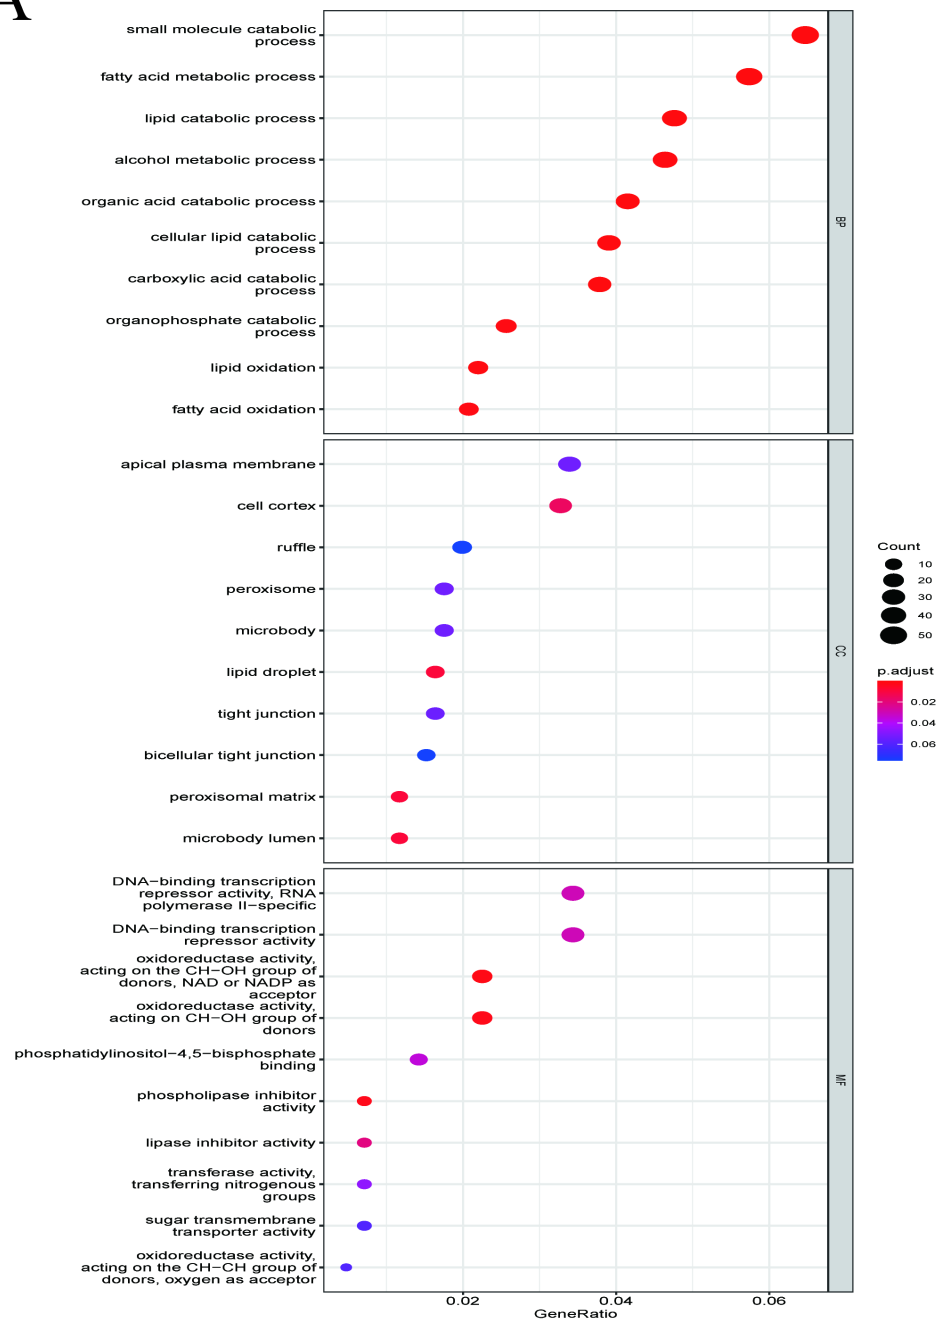

B

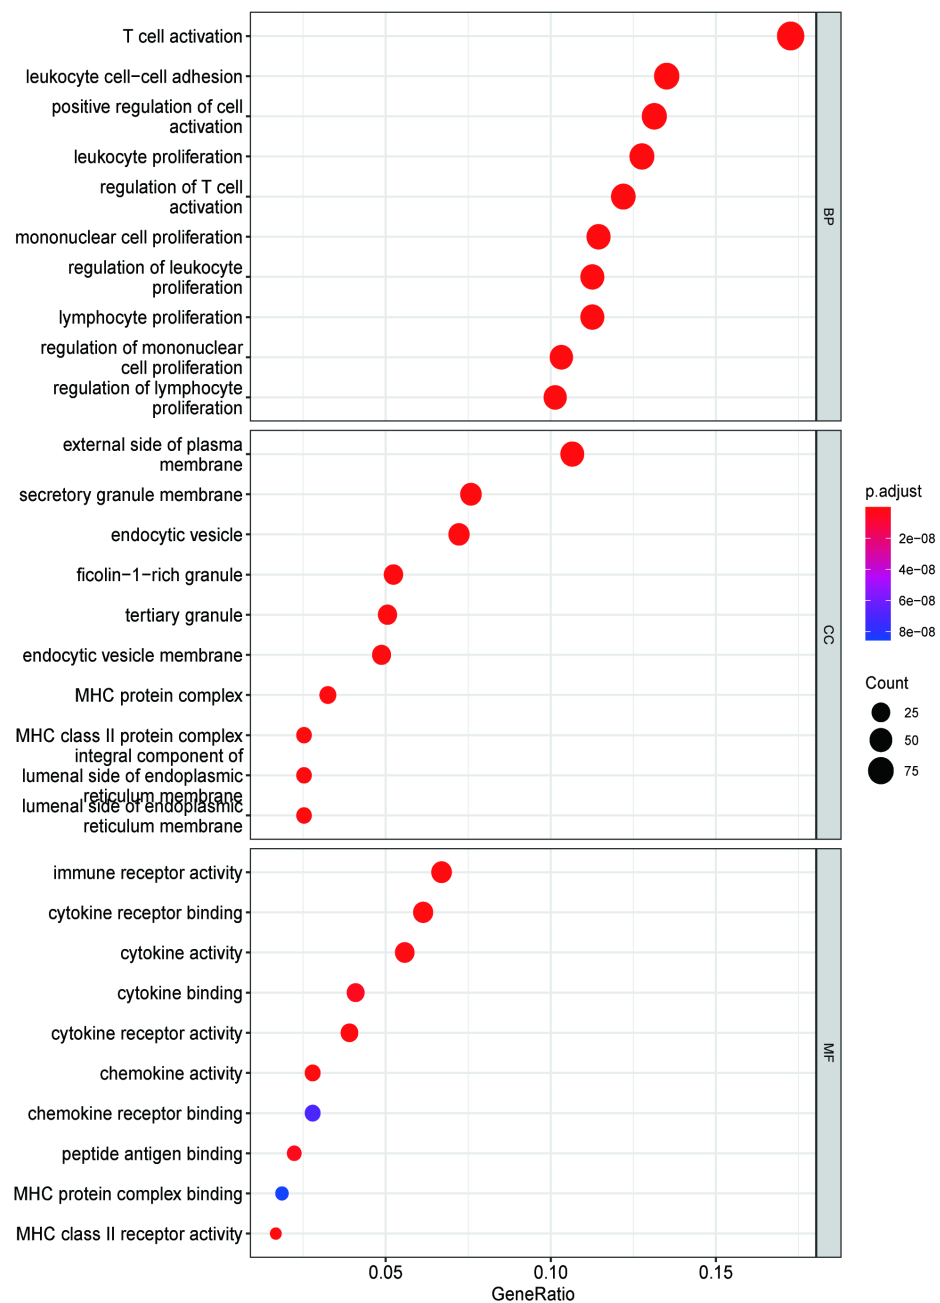

Supplement: f1 [file 3170950.f1.zip]

A

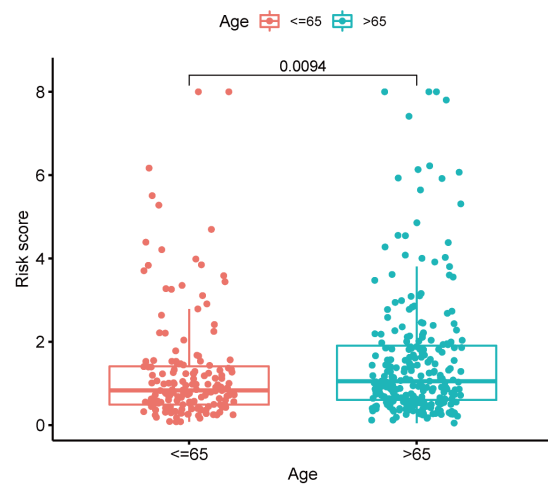

B

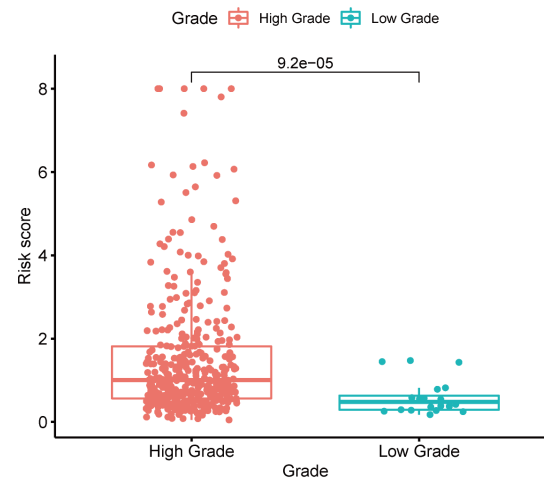

C

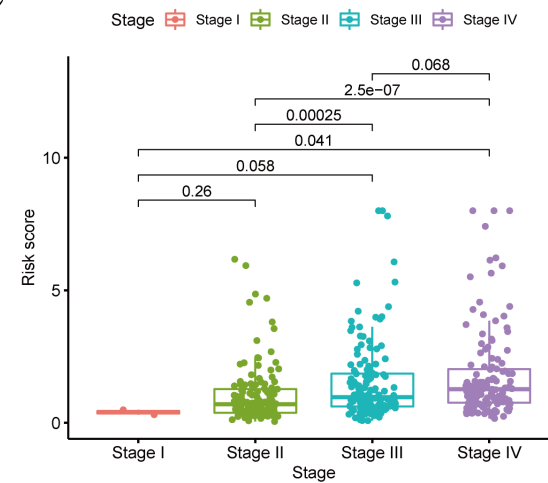

D

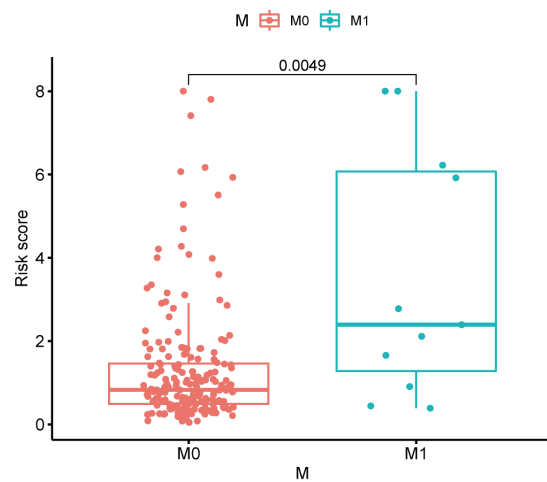

E

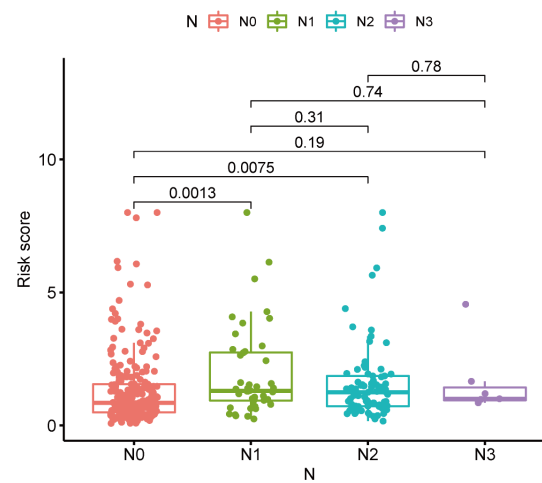

F

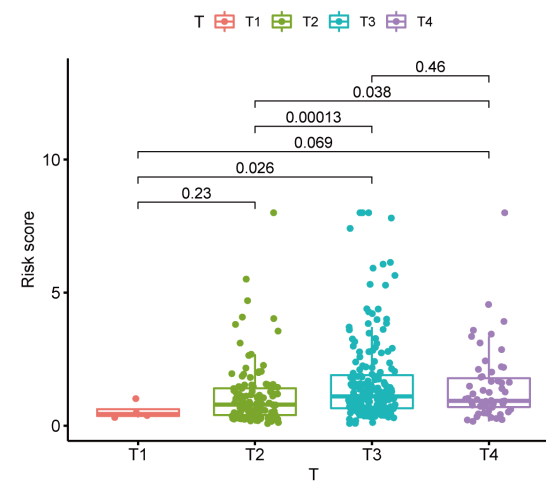

Supplement: f1 [file 3170950.f1.zip]
